# Supplementary material for: Structure of an engineered multidrug transporter MdfA reveals the molecular basis for substrate recognition
Source: PubMed Central journal article supplement (PMC6572762; doi:10.1038/s42003-019-0446-y), 2019-06-17
Supplement: 42003_2019_446_MOESM4_ESM.pdf [file 42003_2019_446_MOESM4_ESM.pdf]

## **Description of Additional Supplementary Files**

**File Name:** Supplementary Data 1

**Description:** Source data for figures
